# Supplementary material for: Self-compassion, ego-resiliency, coping with stress and the quality of life of parents of children with autism spectrum disorder
Source: PeerJ journal article supplement (doi:10.7717/peerj.11198), 2021-05-03
Supplement: SCSSshort_ok.pdf [file SCSSshort_ok.pdf]

**Krótką skalą współczującej postawy wobec samego siebie**  
(Raes, Pommier, Neff, Van Gucht, 2011)

**Instrukcja:** Proszę, odpowiedz na wszystkie pytania najlepiej, jak potrafisz. Jeśli nie jesteś pewien/pewna którejś odpowiedzi, proszę, wpisz najbardziej pasującą. To ważne, aby wypełnić wszystkie pytania. Nie ma złych, ani dobrych odpowiedzi, nie ma też podchwytliwych pytań.

| 1                           | 2                    | 3                     | 4                     | 5                     |
|-----------------------------|----------------------|-----------------------|-----------------------|-----------------------|
| zupełnie do mnie nie pasuje | słabo do mnie pasuje | trochę do mnie pasuje | raczej do mnie pasuje | bardzo do mnie pasuje |

|       |                                                                                                                      |
|-------|----------------------------------------------------------------------------------------------------------------------|
| ..... | 1.Kiedy nie podołam ważnej dla mnie rzeczy, przepelnia mnie poczucie własnej nieudolności.                           |
| ..... | 2.Staram się wykazywać cierpliwość i zrozumienie wobec elementów mojej osobowości, których nie lubię.                |
| ..... | 3.Kiedy wydarza się coś bolesnego, staram się zachować wyważone spojrzenie na sytuację                               |
| ..... | 4.Kiedy jestem przygnębiony, mam tendencję do postrzegania innych ludzi jako prawdopodobnie szczęśliwszych ode mnie. |
| ..... | 5.Staram się postrzegać porażki jako część ludzkiej natury.                                                          |
| ..... | 6.Kiedy przechodzę przez bardzo trudny czas, okazuję sobie troskę i czułość, której potrzebuję                       |
| ..... | 7.Kiedy coś mnie zdenerwuje, staram się zachować równowagę emocjonalną.                                              |
| ..... | 8.Kiedy nie powodzi mi się coś ważnego, czuję się samotny we własnej porażce.                                        |
| ..... | 9.Kiedy jestem przygnębiony, mam obsesję na punkcie wszystkiego co jest złe.                                         |
| ..... | 10.Kiedy czuję się w jakiś sposób nieudolny, staram się sobie przypomnieć, że to odczucie podziela większość ludzi.  |
| ..... | 11.Jestem krytyczny i potępiam moje wady i niedociągnięcia.                                                          |
| ..... | 12.Jestem nietolerancyjny i niecierpliwy wobec pewnych elementów mojej osobowości.                                   |
